- of Anesthesiologists' physical status system: A multicentre Francophone study to analyse reasons for classification disagreement. *Eur J Anaesthesiol* 2011; 28:742–7
38. Cohen ME, Bilimoria KY, Ko CY, Richards K, Hall BL: Effect of subjective preoperative variables on risk-adjusted assessment of hospital morbidity and mortality. *Ann Surg* 2009; 249:682–9
  39. Ragg JL, Watters DA, Guest GD: Preoperative risk stratification for mortality and major morbidity in major colorectal surgery. *Dis Colon Rectum* 2009; 52:1296–303
  40. Dalton JE, Kurz A, Turan A, Mascha EJ, Sessler DI, Saager L: Development and validation of a risk quantification index for 30-day postoperative mortality and morbidity in noncardiac surgical patients. *ANESTHESIOLOGY* 2011; 114:1336–44
  41. Davenport DL, Bowe EA, Henderson WG, Khuri SF, Mentzer RM Jr: National Surgical Quality Improvement Program (NSQIP) risk factors can be used to validate American Society of Anesthesiologists Physical Status Classification (ASA PS) levels. *Ann Surg* 2006; 243:636–41; discussion 641–4
  42. Sessler DI, Sigl JC, Manberg PJ, Kelley SD, Schubert A, Chamoun NG: Broadly applicable risk stratification system for predicting duration of hospitalization and mortality. *ANESTHESIOLOGY* 2010; 113:1026–37
  43. Sigakis MJ, Bittner EA, Wanderer JP: Validation of a risk stratification index and risk quantification index for predicting patient outcomes: in-hospital mortality, 30-day mortality, 1-year mortality, and length-of-stay. *ANESTHESIOLOGY* 2013; 119:525–40
  44. Dalton JE, Glance LG, Mascha EJ, Ehrlinger J, Chamoun N, Sessler DI: Impact of present-on-admission indicators on risk-adjusted hospital mortality measurement. *ANESTHESIOLOGY* 2013; 118:1298–306

## ANESTHESIOLOGY REFLECTIONS FROM THE WOOD LIBRARY-MUSEUM

### A “Nitrous Oxide Gas” Advertising Bookmark from Dr. A. K. Harroun

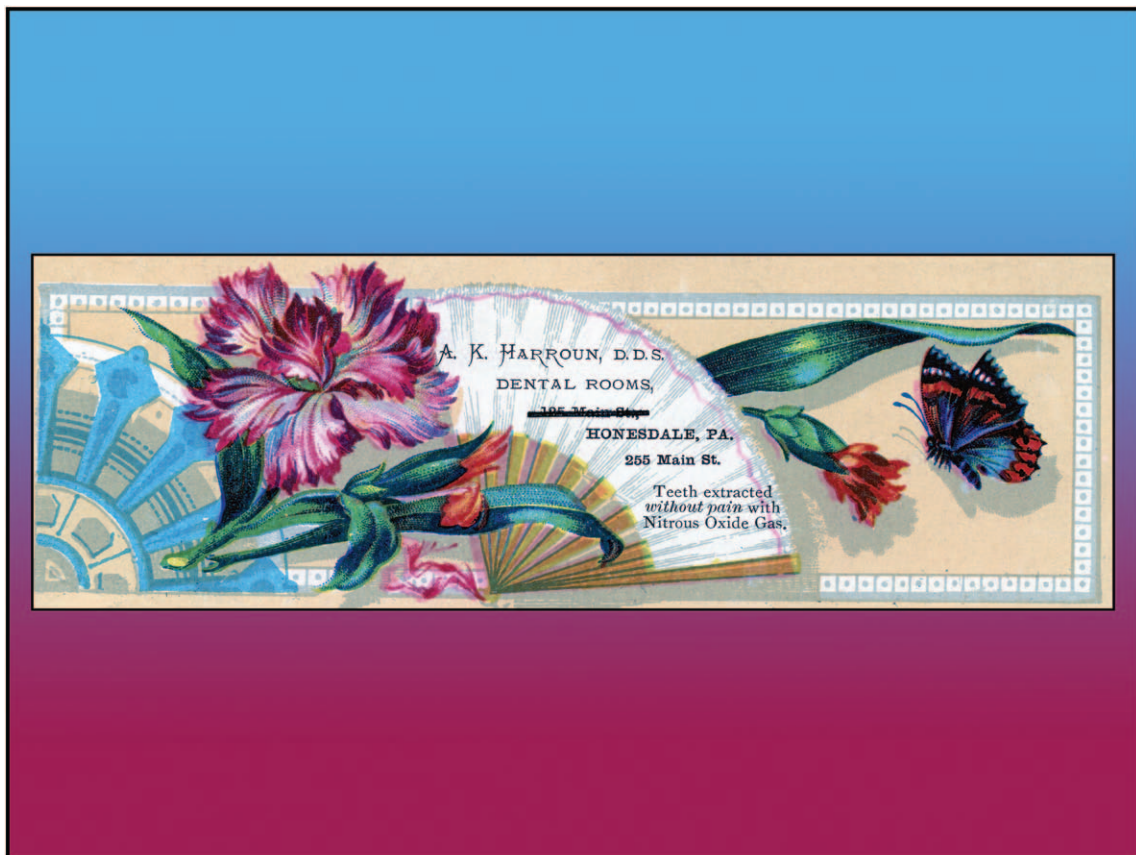

According to the July 1882 issue of *The Odontographic Journal*, “the bogus dental college of Morrison & Co., at Delevan, Wis[consin] ... issued an ‘announcement’ ... with ... a list of its graduates ... [whose] sheepskins are going ‘dog cheap’ at twelve dollars.” One of the 1881 graduates listed is “A. K. Harroun, ... Pennsylvania.” On his advertising bookmark above, that graduate lists himself as “A. K. Harroun, D.D.S. Dental Rooms ... Honesdale, Pa.” Because his office shifted from 125 to 255 Main Street, Dr. Harroun had to strike the old address and stamp in the new one on his old stock of bookmarks. He is careful to note that, “Teeth extracted without pain with Nitrous Oxide Gas.”

From the mid-1860s through the 1880s, most dentists who administered laughing gas to patients were titled “Dr.” as an honorific rather than by an earned degree. Among dentists who learned their profession from a preceptor rather than a professor, most resisted ordering mail order degrees from “Morrison & Co.” This advertising bookmark is part of the Wood Library-Museum’s Ben Z. Swanson Collection. (Copyright © the American Society of Anesthesiologists, Inc.)

George S. Bause, M.D., M.P.H., Honorary Curator, ASA’s Wood Library-Museum of Anesthesiology, Schaumburg, Illinois, and Clinical Associate Professor, Case Western Reserve University, Cleveland, Ohio. UJYC@aol.com.
